# Supplementary material for: The local immune response during Echinococcus granulosus growth in a quantitative hepatic experimental model
Source: PubMed Central journal article supplement (PMC6928226; doi:10.1038/s41598-019-56098-3), 2019-12-23
Supplement: 41598_2019_56098_MOESM1_ESM.pdf [file 41598_2019_56098_MOESM1_ESM.pdf]

# The local immune response during *Echinococcus granulosus* growth in a quantitative hepatic experimental model

Zhide Li<sup>1, 2, 3¶</sup>, Chuanshan Zhang<sup>3, 4¶</sup>, Liang Li<sup>5</sup>, Xiaojuan Bi<sup>3</sup>, Liang Li<sup>3</sup>, Shuting Yang<sup>1, 3</sup>, Ning Zhang<sup>1, 2</sup>, Hui Wang<sup>1, 3</sup>, Ning Yang<sup>1, 3</sup>, Abuduaini Abulizi<sup>1, 2</sup>, Abudusalamu Aini<sup>1, 2</sup>, Renyong Lin<sup>3</sup>, Dominique A.Vuitton<sup>6</sup>, Hao Wen<sup>1, 2, 3\*</sup>

<sup>1</sup>State Key Laboratory of Pathogenesis, Prevention, Treatment of High Incidence Diseases in Central Asia, the First Affiliated Hospital of Xinjiang Medical University, Urumqi, Xinjiang, China.

<sup>2</sup>Department of Hepatic Hydatid and Hepatobiliary Surgery, Digestive and Vascular Surgery Centre, the First Affiliated Hospital of Xinjiang Medical University, Urumqi, Xinjiang, China.

<sup>3</sup>Xinjiang Key Laboratory of Echinococcosis, and WHO-Collaborating Center on Prevention and Care Management of Echinococcosis, Clinical Research Institute, the First Affiliated Hospital of Xinjiang Medical University, Urumqi, Xinjiang, China.

<sup>4</sup>Basic Medical College, Xinjiang Medical University, Urumqi, Xinjiang, China.

<sup>5</sup>Chronic Disease Laboratory, Institutes for Life Sciences and School of Medicine, South China University of Technology, Guangzhou, China

<sup>6</sup> French National Reference Center for Echinococcosis, Department of Parasitology, University Hospital, Besançon, France and University Bourgogne Franche-Comté (EA 3181), Besançon, France .

\*Corresponding author

Email: Dr.wenhao@163.com (HW)

<sup>†</sup>These authors contributed equally to this work.

## **Additional information**

**Supplementary Figure S1. Macroscopic views of the liver in mice during the course of infection.** The white cysts in the livers represent established parasites. PSCs: protoscoleces. Yellow circles highlight cysts structures in the liver. Representative samples are presented.

**Supplementary Figure S2. Hepatic fibrosis in infected mice during the course of infection.** (a) Liver fibrosis was determined by picric acid-Sirius red staining (original magnification×100). The red area represents fibrillar collagen. (b) The fibrotic area of the section was quantified using the cellSens Dimension software, to determine the ratio of collagen area to total area (%). (c) Immunohistochemical staining for  $\alpha$ -SMA for detection of activated hepatic stellate cells (HSCs). (d) The percentage of positive  $\alpha$ -SMA-expressing cells to lesion areas was calculated at 2, 12 and 24 weeks post-infection. Bars indicate 100 $\mu$ m or 20 $\mu$ m in the 100 $\times$  or in the 400 $\times$  magnification images, respectively. Con: control; LD: 50 PSCs; MD: 500 PSCs; HD: 2000 PSCs. Data are shown as mean  $\pm$  standard error of the mean (SEM, 4–6 mice per group), \* $p$ < 0.05, \*\* $p$ < 0.01 and \*\*\* $p$ < 0.001.

**Supplementary Figure S3. Hepatic memory T cell phenotypes in mice after 24 weeks-infection.** Expression of CD44 and CD62L in hepatic

CD4<sup>+</sup> T and CD8<sup>+</sup> T cells from mice infected with different PSC inocula. Representative FACS plots are shown. LD: 50 PSCs; MD: 500 PSCs; HD: 2000 PSCs. Data are shown as mean values (4–6 mice per group).

**Supplementary Figure S4. Representative FACS plots gated on hepatic T cell subsets in mice after 24 weeks-infection.** (a) Intracellular staining of IFN- $\gamma$ <sup>+</sup> in hepatic CD4<sup>+</sup> T cells from mice with different PSC inocula. (b) Intracellular staining of TNF- $\alpha$ <sup>+</sup> in hepatic CD4<sup>+</sup> T cells. (c) Intracellular staining of IFN- $\gamma$ <sup>+</sup> in hepatic CD8<sup>+</sup> T cells. (d) Intracellular staining of TNF- $\alpha$ <sup>+</sup> in hepatic CD8<sup>+</sup> T cells. (e) Intracellular staining of Foxp3<sup>+</sup> in hepatic CD4<sup>+</sup> CD25<sup>+</sup> T cells. (f) Intracellular staining of IL-10<sup>+</sup> in hepatic CD8<sup>+</sup> T cells. (g) Intracellular staining of IL-4<sup>+</sup> in hepatic CD4<sup>+</sup> T cells. (h) Intracellular staining of IL-17A<sup>+</sup> in hepatic CD4<sup>+</sup> T cells. (i) Intracellular staining of IL-10<sup>+</sup> in hepatic CD4<sup>+</sup> T cells. Representative FACS plots are shown. LD: 50 PSCs; MD: 500 PSCs; HD: 2000 PSCs. Data are shown as mean values (4–6 mice per group).

**Supplementary Figure S5. Comparison of T cell subsets profiles in the liver of mice during the course of infection.** Data relating to *E. multilocularis* infection were quoted from the published paper by Zhang et al, 2017 [10]. For purpose of comparison, the course of T cell subsets in the low dose group, the medium dose group and the high dose group are shown in the figure.

**Supplementary Table S1. Effect of *E. granulosus* s.s. PSCs on the number and distribution of cysts in mice.**

**Supplementary Table S2. Formation ratio and distribution of cysts in mice infected with *E. granulosus* s.s. protoscoleces (PSCs).**



**Supplementary Fig. S2 Hepatic fibrosis in mice infected during the course of infection.**

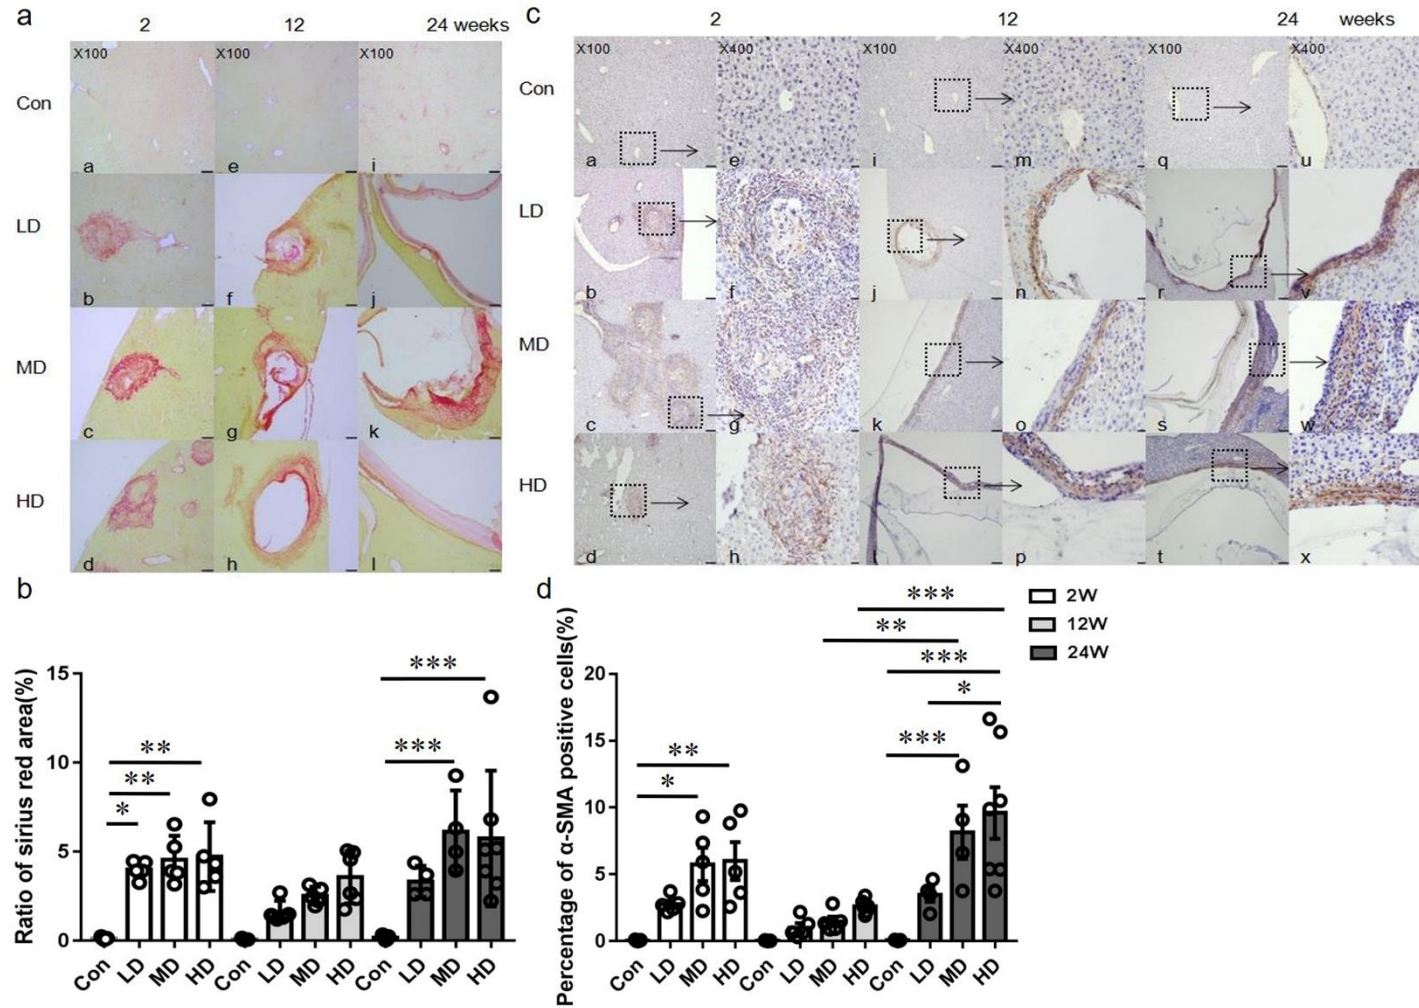

Supplementary Fig. S3 Hepatic memory T cell phenotypes in mice after 24 weeks-infection.

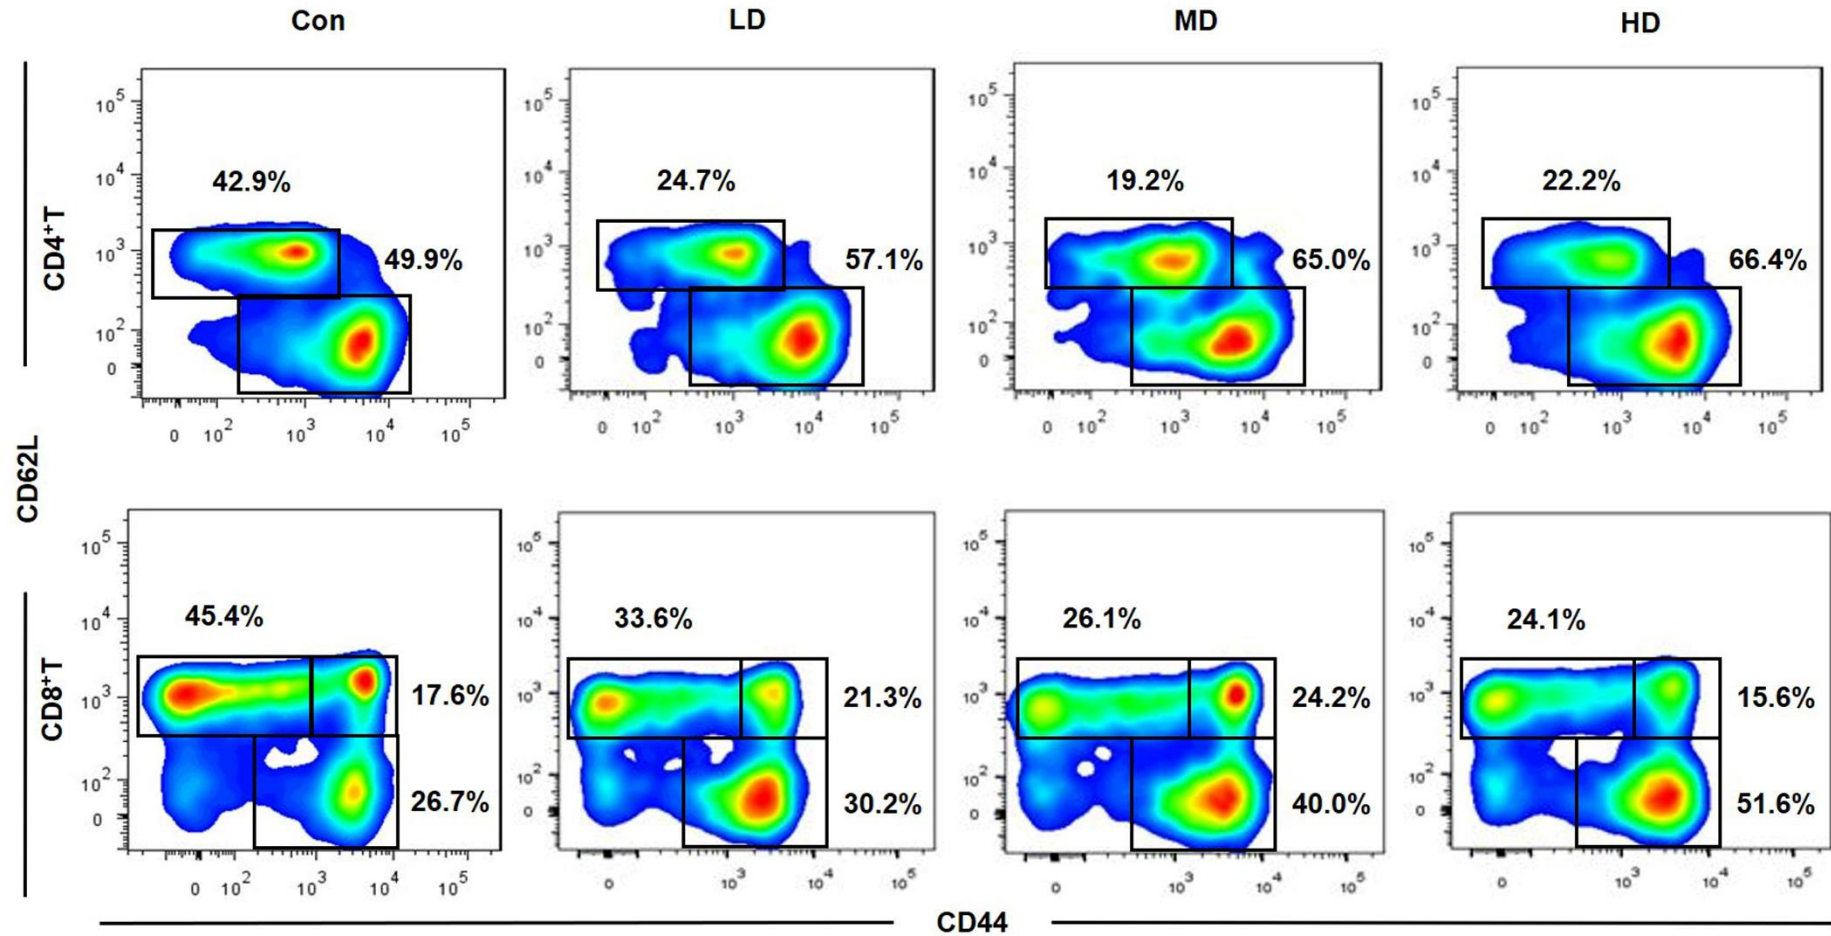



**Supplementary Fig. S4 Representative FACS plots gated on hepatic T cell subsets in mice after 24 weeks-infection.**

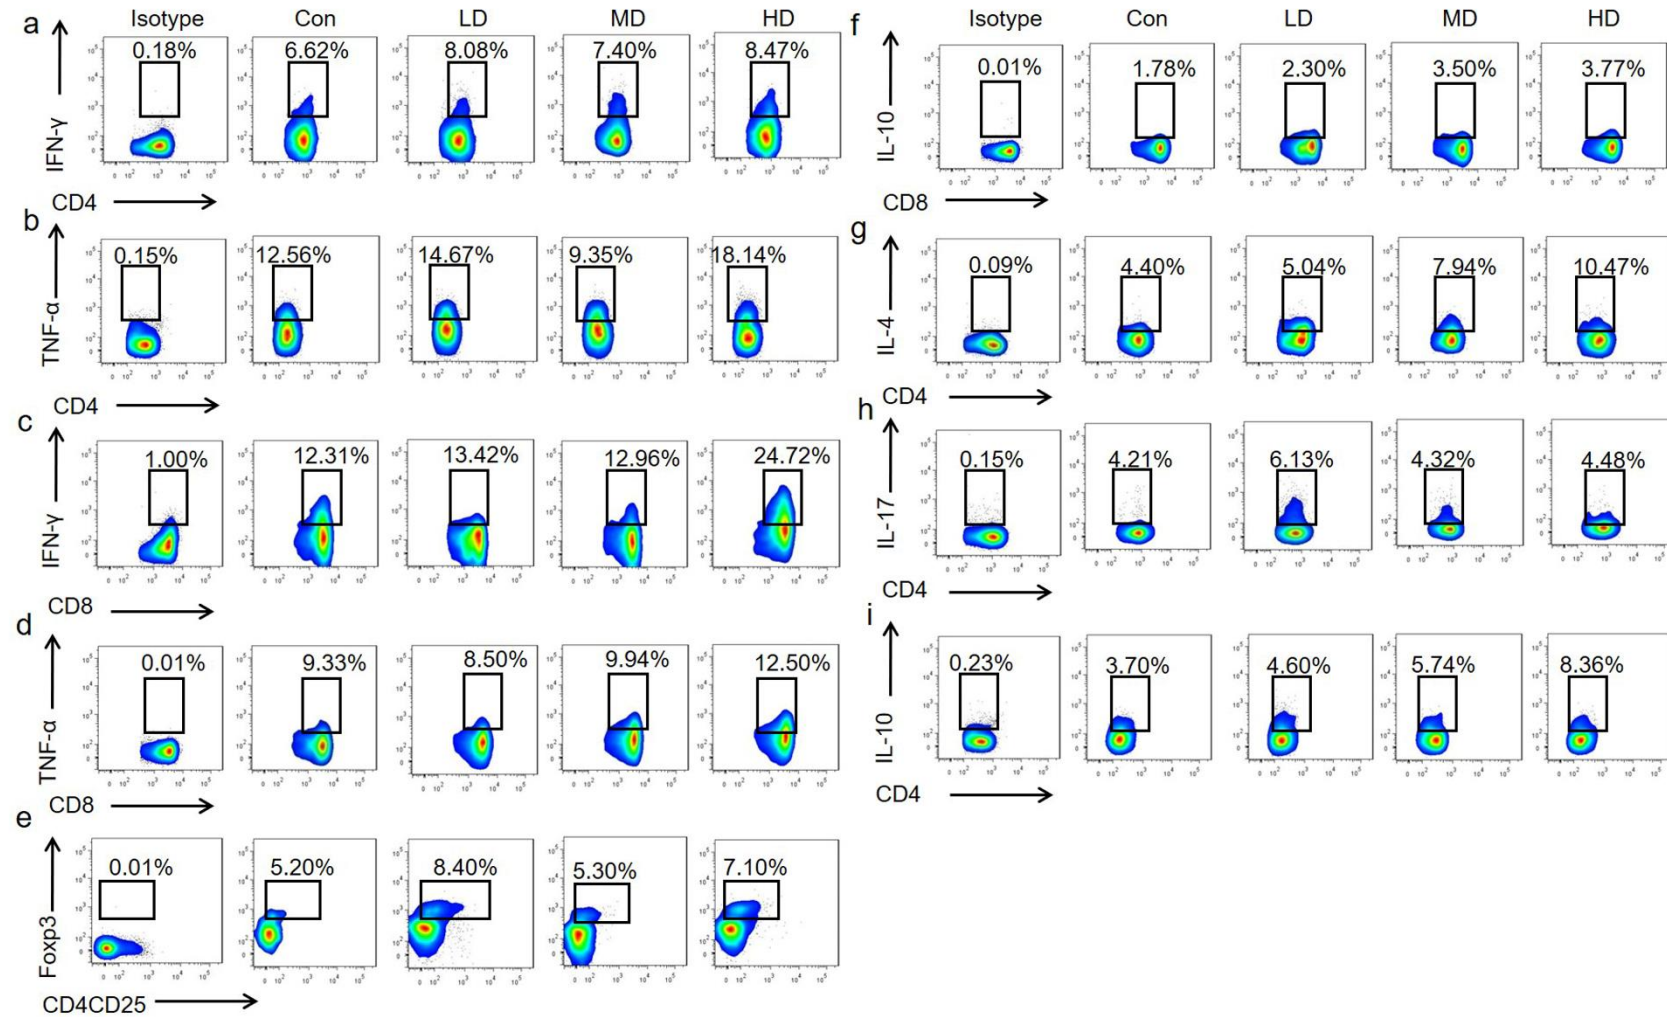

Supplementary Fig. S5 Comparison of T cell subsets profiles in the liver from mice during the course of infection.

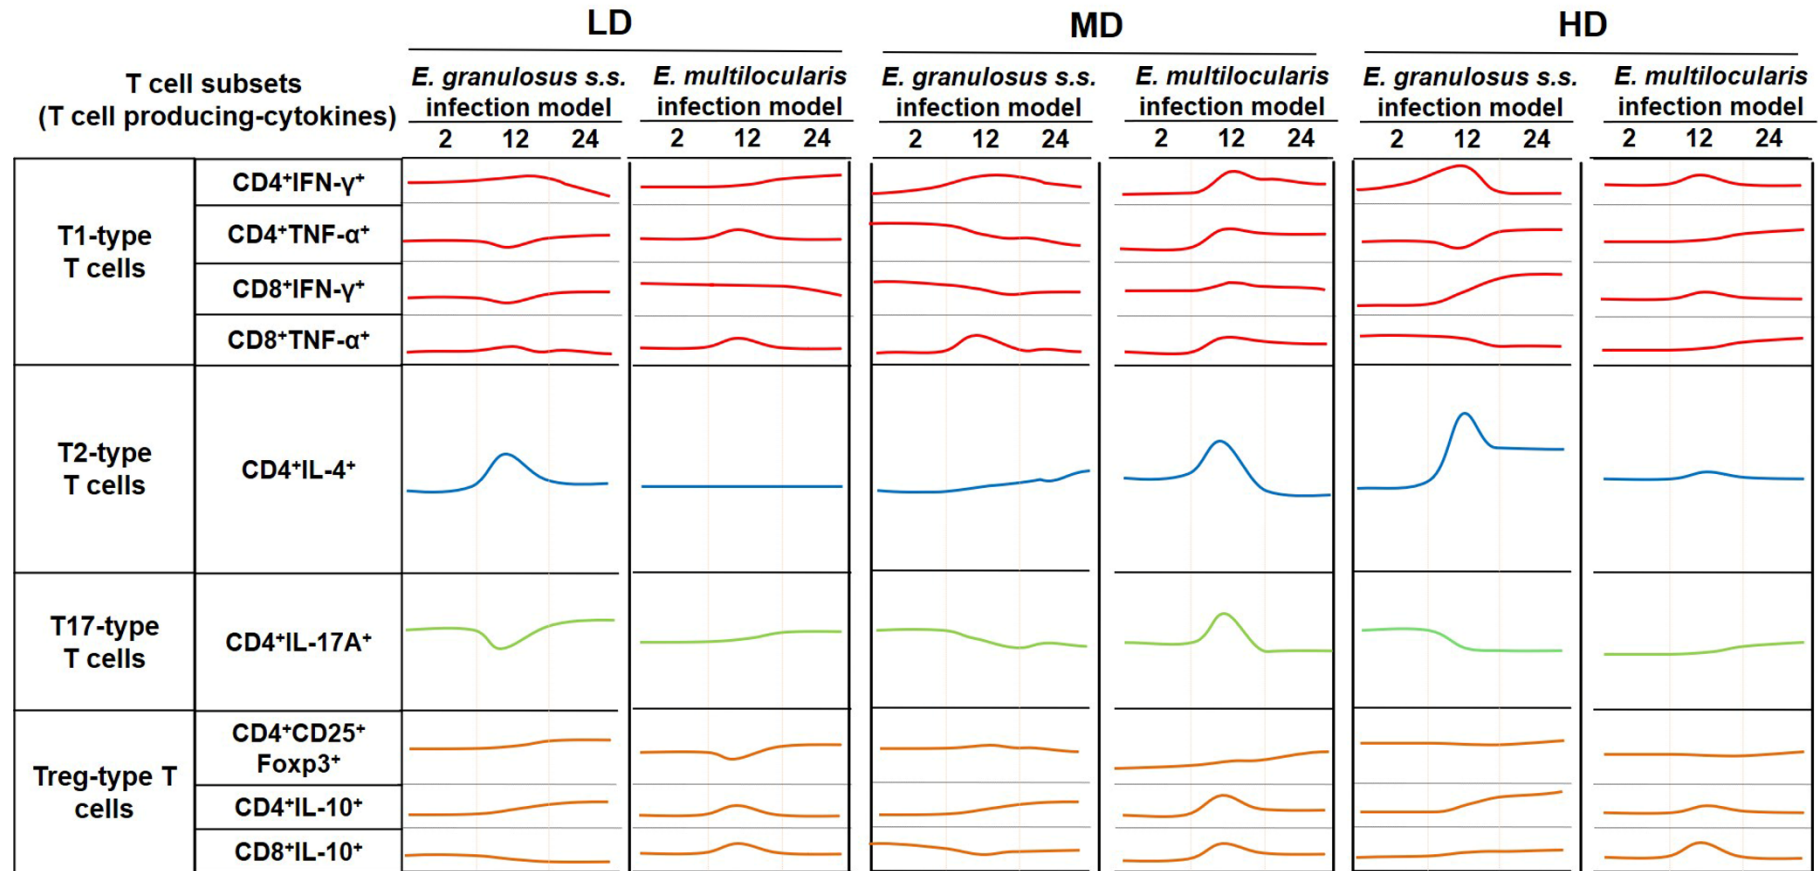

**Supplementary Table S1. Effect of *E. granulosus* s.s. PSCs on the number and distribution of cysts in mice.**

| Time/<br>weeks | Group/<br>doses | Percentage<br>of infection<br>/% | No. infected mice |  | Mean No.<br>cysts* | Number of mice(Location/number of cysts) |        |        |        |          |   |
|----------------|-----------------|----------------------------------|-------------------|--|--------------------|------------------------------------------|--------|--------|--------|----------|---|
|                |                 |                                  | No. mice in group |  |                    | 1                                        | 2      | 3      | 4      | 5        | 6 |
| 2              | 50              |                                  | 0(0/5)            |  | 0                  | N                                        | N      | N      | N      | N        |   |
|                | 250             |                                  | 0(0/5)            |  | 0                  | N                                        | N      | N      | N      | N        |   |
|                | 500             |                                  | 0(0/5)            |  | 0                  | N                                        | N      | N      | N      | N        |   |
|                | 1000            |                                  | 0(0/5)            |  | 0                  | N                                        | N      | N      | N      | N        |   |
|                | 2000            |                                  | 0(0/5)            |  | 0                  | N                                        | N      | N      | N      | N        |   |
| 4              | 50              |                                  | 0(0/5)            |  | 0                  | N                                        | N      | N      | N      | N        |   |
|                | 250             |                                  | 0(0/5)            |  | 0                  | N                                        | N      | N      | N      | N        |   |
|                | 500             |                                  | 0(0/5)            |  | 0                  | N                                        | N      | N      | N      | N        |   |
|                | 1000            |                                  | 0(0/5)            |  | 0                  | N                                        | N      | N      | N      | N        |   |
|                | 2000            |                                  | 20(1/5)           |  | 0.2                | N                                        | N      | C1     | N      | N        |   |
| 8              | 50              |                                  | 20(1/5)           |  | 0.6                | N                                        | N      | M1R2   | N      | N        |   |
|                | 250             |                                  | 80(4/5)           |  | 0.8                | L1                                       | L1     | L1     | N      | L1       |   |
|                | 500             |                                  | 80(4/5)           |  | 1.6                | C2                                       | N      | M1C1   | R1C1   | R1C1     |   |
|                | 1000            |                                  | 60(3/5)           |  | 2.6                | R1                                       | L4R4C2 | C2     | N      | N        |   |
|                | 2000            |                                  | 60(3/5)           |  | 3.0                | L2C2                                     | L6R1   | N      | L1C3   | N        |   |
| 12             | 50              |                                  | 60(3/5)           |  | 1.2                | L2C1                                     | L1     | C2     | N      | N        |   |
|                | 250             |                                  | 100(5/5)          |  | 4.6                | M1C2                                     | L3R2C1 | L2R1C7 | M1R1C1 | L1       |   |
|                | 500             |                                  | 100(5/5)          |  | 4.6                | L2M2R3C3                                 | L2M3C2 | C1     | L1     | R1C3     |   |
|                | 1000            |                                  | 100(5/5)          |  | 6.6                | M2R1C4                                   | L5M5C3 | L3M2C2 | L1R2   | L2C1     |   |
|                | 2000            |                                  | 100(5/5)          |  | 5.4                | L2C5                                     | M1R1C1 | C5     | C1     | L1M5R2C3 |   |
| 16             | 50              |                                  | 60(3/5)           |  | 2.6                | N                                        | L1     | L2C3   | L4R1C2 | N        |   |

|    |      |          |      |         |          |             |          |          |                    |
|----|------|----------|------|---------|----------|-------------|----------|----------|--------------------|
|    | 250  | 100(5/5) | 5.4  | L4M1C3  | L1M2C1   | M2C1        | M1C4     | L3R1C3   |                    |
|    | 500  | 80(4/5)  | 7.4  | N       | L1C5     | L5M4R5C4    | M1R2C3   | L1R5C1   |                    |
|    | 1000 | 100(5/5) | 6.6  | R1C3    | C1       | L8M2R4C6    | L3C3     | C2       |                    |
|    | 2000 | 80(4/5)  | 9.4  | L1C2    | L1R5C12  | L4M2R1C3    | N        | L3M4R7C2 |                    |
| 20 | 50   | 100(4/4) | 3.5  | M2R1C3  | C2       | C2          | C4       |          |                    |
|    | 250  | 100(5/5) | 11.2 | L1C5    | L4C15    | L3M2C3      | L3M2R6C5 | C7       |                    |
|    | 500  | 100(5/5) | 12.6 | L7R1C6  | L1M1R1C1 | C2          | R3C13    | L27      |                    |
|    | 1000 | 80(4/5)  | 14.8 | L2C10   | N        | L5R2C3      | L1       | M24C25D2 |                    |
|    | 2000 | 80(4/5)  | 5.8  | L7      | L2C1     | L2M5R5C4    | R1C2     | N        |                    |
| 24 | 50   | 100(4/4) | 4.0  | C2      | C3       | L2R2C4      | M1C2     |          |                    |
|    | 250  | 75(3/4)  | 5.75 | N       | L2C2D1   | M3C9        | M1R1C3D1 |          |                    |
|    | 500  | 100(4/4) | 14.5 | C2D3    | L9C11    | L5M1R5C10D3 | L4R3C2   |          |                    |
|    | 1000 | 100(5/5) | 16.0 | L1C24D2 | L2M1C3   | L3M1R1C2    | M13C6    | R3C15D3  |                    |
|    | 2000 | 100(6/6) | 26.8 | L2C1    | D1       | L1          | L6M9C7   | L10M9C6  | L23M17R25<br>C42D2 |

\*Mean No. cysts = Total number of cysts / Number of mice

N=None, L= Left lobe of liver, M = Middle lobe of liver, R = Right lobe of liver, C = Caudate lobe of liver, D = Dissociative cysts

**Supplementary Table S2. Formation ratio and distribution of cysts in mice infected with *E. granulosus* s.s. PSCs.**

| Time/<br>weeks | Group/<br>doses | Mean ratio of<br>cyst formation /%* | Number of cysts       |                         |               |
|----------------|-----------------|-------------------------------------|-----------------------|-------------------------|---------------|
|                |                 |                                     | Liver:number(percent) | Abdomen:number(percent) | Total: number |
| 2              | 50              | 0                                   | 0(0)                  | 0(0)                    | 0             |
|                | 250             | 0                                   | 0(0)                  | 0(0)                    | 0             |
|                | 500             | 0                                   | 0(0)                  | 0(0)                    | 0             |
|                | 1000            | 0                                   | 0(0)                  | 0(0)                    | 0             |
|                | 2000            | 0                                   | 0(0)                  | 0(0)                    | 0             |
| 4              | 50              | 0                                   | 0(0)                  | 0(0)                    | 0             |
|                | 250             | 0                                   | 0(0)                  | 0(0)                    | 0             |
|                | 500             | 0                                   | 0(0)                  | 0(0)                    | 0             |
|                | 1000            | 0                                   | 0(0)                  | 0(0)                    | 0             |
|                | 2000            | 0.01                                | 1(100)                | 0(0)                    | 1             |
| 8              | 50              | 1.20                                | 3(100)                | 0(0)                    | 3             |
|                | 250             | 0.32                                | 4(100)                | 0(0)                    | 4             |
|                | 500             | 0.28                                | 7(100)                | 0(0)                    | 7             |
|                | 1000            | 0.26                                | 13(100)               | 0(0)                    | 13            |
|                | 2000            | 0.15                                | 15(100)               | 0(0)                    | 15            |
| 12             | 50              | 2.40                                | 6(100)                | 0(0)                    | 6             |
|                | 250             | 1.84                                | 23(100)               | 0(0)                    | 23            |
|                | 500             | 0.92                                | 23(100)               | 0(0)                    | 23            |
|                | 1000            | 0.66                                | 33(100)               | 0(0)                    | 33            |
|                | 2000            | 0.54                                | 27(100)               | 0(0)                    | 27            |
| 16             | 50              | 5.20                                | 13(100)               | 0(0)                    | 13            |
|                | 250             | 2.16                                | 27(100)               | 0(0)                    | 27            |

|    |      |      |            |          |     |
|----|------|------|------------|----------|-----|
|    | 500  | 1.48 | 37(100)    | 0(0)     | 37  |
|    | 1000 | 0.66 | 33(100)    | 0(0)     | 33  |
|    | 2000 | 0.47 | 47(100)    | 0(0)     | 47  |
| 20 | 50   | 7.00 | 14(100)    | 0(0)     | 14  |
|    | 250  | 4.48 | 56(100)    | 0(0)     | 56  |
|    | 500  | 2.52 | 63(100)    | 0(0)     | 63  |
|    | 1000 | 1.44 | 72(97.3)   | 2(2.7)   | 74  |
|    | 2000 | 0.29 | 29(100)    | 0(0)     | 29  |
| 24 | 50   | 8.00 | 16(100)    | 0(0)     | 16  |
|    | 250  | 2.10 | 21(91.3)   | 2(8.70)  | 23  |
|    | 500  | 2.60 | 52(89.70)  | 6(10.30) | 58  |
|    | 1000 | 1.50 | 75(93.75)  | 5(6.25)  | 80  |
|    | 2000 | 1.58 | 158(98.10) | 3(1.90)  | 161 |

\* Mean ratio of cyst formation (%) = Total number of cysts/ (Number of PSCs × Number of mice)
